# Supplementary material for: Nutritional Properties of Rice Varieties Commonly Consumed in Italy and Applicability in Gluten Free Diet
Source: MDPI journal article supplement (doi:10.3390/foods10061375), 2021-06-14
Supplement: s1 [file s1]

**Table S2.** Tukey's multiple comparisons test of detectable carbohydrates content.

| <b>Tukey's multiple comparisons test</b>  | <b>Summary</b> | <b>Adjusted P Value</b> |
|-------------------------------------------|----------------|-------------------------|
| Ribe:Raw vs. Ribe:Boiling                 | ****           | <0,0001                 |
| Ribe:Raw vs. Ribe:Stewing                 | ****           | <0,0001                 |
| Ribe:Raw vs. Ribe:Microwaving             | ****           | <0,0001                 |
| Ribe:Raw vs. Basmati:Raw                  | ns             | 0,9993                  |
| Ribe:Raw vs. Basmati:Boiling              | ****           | <0,0001                 |
| Ribe:Raw vs. Basmati:Stewing              | ****           | <0,0001                 |
| Ribe:Raw vs. Basmati:Microwaving          | ****           | <0,0001                 |
| Ribe:Raw vs. Carnaroli:Raw                | ns             | 0,9998                  |
| Ribe:Raw vs. Carnaroli:Boiling            | ****           | <0,0001                 |
| Ribe:Raw vs. Carnaroli:Stewing            | ****           | <0,0001                 |
| Ribe:Raw vs. Carnaroli:Microwaving        | ****           | <0,0001                 |
| Ribe:Raw vs. Vialone nano:Raw             | ns             | 0,9982                  |
| Ribe:Raw vs. Vialone nano:Boiling         | ****           | <0,0001                 |
| Ribe:Raw vs. Vialone nano:Stewing         | ****           | <0,0001                 |
| Ribe:Raw vs. Vialone nano:Microwaving     | ****           | <0,0001                 |
| Ribe:Raw vs. Fragrance:Raw                | ns             | >0,9999                 |
| Ribe:Raw vs. Fragrance:Boiling            | ****           | <0,0001                 |
| Ribe:Raw vs. Fragrance:Stewing            | ****           | <0,0001                 |
| Ribe:Raw vs. Fragrance:Microwaving        | ****           | <0,0001                 |
| Ribe:Raw vs. Arborio:Raw                  | ns             | >0,9999                 |
| Ribe:Raw vs. Arborio:Boiling              | ****           | <0,0001                 |
| Ribe:Raw vs. Arborio:Stewing              | ****           | <0,0001                 |
| Ribe:Raw vs. Arborio:Microwaving          | ****           | <0,0001                 |
| Ribe:Boiling vs. Ribe:Stewing             | ****           | <0,0001                 |
| Ribe:Boiling vs. Ribe:Microwaving         | ****           | <0,0001                 |
| Ribe:Boiling vs. Basmati:Raw              | ****           | <0,0001                 |
| Ribe:Boiling vs. Basmati:Boiling          | ****           | <0,0001                 |
| Ribe:Boiling vs. Basmati:Stewing          | ****           | <0,0001                 |
| Ribe:Boiling vs. Basmati:Microwaving      | ****           | <0,0001                 |
| Ribe:Boiling vs. Carnaroli:Raw            | ****           | <0,0001                 |
| Ribe:Boiling vs. Carnaroli:Boiling        | ns             | 0,2959                  |
| Ribe:Boiling vs. Carnaroli:Stewing        | ****           | <0,0001                 |
| Ribe:Boiling vs. Carnaroli:Microwaving    | ****           | <0,0001                 |
| Ribe:Boiling vs. Vialone nano:Raw         | ****           | <0,0001                 |
| Ribe:Boiling vs. Vialone nano:Boiling     | ****           | <0,0001                 |
| Ribe:Boiling vs. Vialone nano:Stewing     | **             | 0,0068                  |
| Ribe:Boiling vs. Vialone nano:Microwaving | ****           | <0,0001                 |
| Ribe:Boiling vs. Fragrance:Raw            | ****           | <0,0001                 |
| Ribe:Boiling vs. Fragrance:Boiling        | ***            | 0,0004                  |
| Ribe:Boiling vs. Fragrance:Stewing        | ****           | <0,0001                 |
| Ribe:Boiling vs. Fragrance:Microwaving    | ****           | <0,0001                 |
| Ribe:Boiling vs. Arborio:Raw              | ****           | <0,0001                 |
| Ribe:Boiling vs. Arborio:Boiling          | ns             | 0,5632                  |
| Ribe:Boiling vs. Arborio:Stewing          | ****           | <0,0001                 |
| Ribe:Boiling vs. Arborio:Microwaving      | ****           | <0,0001                 |
| Ribe:Stewing vs. Ribe:Microwaving         | ****           | <0,0001                 |
| Ribe:Stewing vs. Basmati:Raw              | ****           | <0,0001                 |
| Ribe:Stewing vs. Basmati:Boiling          | ns             | 0,9998                  |
| Ribe:Stewing vs. Basmati:Stewing          | ns             | 0,4878                  |
| Ribe:Stewing vs. Basmati:Microwaving      | ****           | <0,0001                 |
| Ribe:Stewing vs. Carnaroli:Raw            | ****           | <0,0001                 |
| Ribe:Stewing vs. Carnaroli:Boiling        | ****           | <0,0001                 |
| Ribe:Stewing vs. Carnaroli:Stewing        | ****           | <0,0001                 |
| Ribe:Stewing vs. Carnaroli:Microwaving    | ****           | <0,0001                 |
| Ribe:Stewing vs. Vialone nano:Raw         | ****           | <0,0001                 |
| Ribe:Stewing vs. Vialone nano:Boiling     | ****           | <0,0001                 |
| Ribe:Stewing vs. Vialone nano:Stewing     | ****           | <0,0001                 |
| Ribe:Stewing vs. Vialone nano:Microwaving | ****           | <0,0001                 |
| Ribe:Stewing vs. Fragrance:Raw            | ****           | <0,0001                 |
| Ribe:Stewing vs. Fragrance:Boiling        | ****           | <0,0001                 |

|                                               |      |         |
|-----------------------------------------------|------|---------|
| Ribe:Stewing vs. Fragrance:Stewing            | **** | <0,0001 |
| Ribe:Stewing vs. Fragrance:Microwaving        | **** | <0,0001 |
| Ribe:Stewing vs. Arborio:Raw                  | **** | <0,0001 |
| Ribe:Stewing vs. Arborio:Boiling              | **** | <0,0001 |
| Ribe:Stewing vs. Arborio:Stewing              | **   | 0,0056  |
| Ribe:Stewing vs. Arborio:Microwaving          | **** | <0,0001 |
| Ribe:Microwaving vs. Basmati:Raw              | **** | <0,0001 |
| Ribe:Microwaving vs. Basmati:Boiling          | **** | <0,0001 |
| Ribe:Microwaving vs. Basmati:Stewing          | **** | <0,0001 |
| Ribe:Microwaving vs. Basmati:Microwaving      | ns   | 0,5745  |
| Ribe:Microwaving vs. Carnaroli:Raw            | **** | <0,0001 |
| Ribe:Microwaving vs. Carnaroli:Boiling        | **** | <0,0001 |
| Ribe:Microwaving vs. Carnaroli:Stewing        | ns   | 0,8544  |
| Ribe:Microwaving vs. Carnaroli:Microwaving    | ns   | 0,2646  |
| Ribe:Microwaving vs. Vialone nano:Raw         | **** | <0,0001 |
| Ribe:Microwaving vs. Vialone nano:Boiling     | **** | <0,0001 |
| Ribe:Microwaving vs. Vialone nano:Stewing     | **** | <0,0001 |
| Ribe:Microwaving vs. Vialone nano:Microwaving | **** | <0,0001 |
| Ribe:Microwaving vs. Fragrance:Raw            | **** | <0,0001 |
| Ribe:Microwaving vs. Fragrance:Boiling        | **** | <0,0001 |
| Ribe:Microwaving vs. Fragrance:Stewing        | **** | <0,0001 |
| Ribe:Microwaving vs. Fragrance:Microwaving    | ns   | >0,9999 |
| Ribe:Microwaving vs. Arborio:Raw              | **** | <0,0001 |
| Ribe:Microwaving vs. Arborio:Boiling          | **** | <0,0001 |
| Ribe:Microwaving vs. Arborio:Stewing          | **** | <0,0001 |
| Ribe:Microwaving vs. Arborio:Microwaving      | ns   | 0,7167  |
| Basmati:Raw vs. Basmati:Boiling               | **** | <0,0001 |
| Basmati:Raw vs. Basmati:Stewing               | **** | <0,0001 |
| Basmati:Raw vs. Basmati:Microwaving           | **** | <0,0001 |
| Basmati:Raw vs. Carnaroli:Raw                 | ns   | 0,6004  |
| Basmati:Raw vs. Carnaroli:Boiling             | **** | <0,0001 |
| Basmati:Raw vs. Carnaroli:Stewing             | **** | <0,0001 |
| Basmati:Raw vs. Carnaroli:Microwaving         | **** | <0,0001 |
| Basmati:Raw vs. Vialone nano:Raw              | ns   | >0,9999 |
| Basmati:Raw vs. Vialone nano:Boiling          | **** | <0,0001 |
| Basmati:Raw vs. Vialone nano:Stewing          | **** | <0,0001 |
| Basmati:Raw vs. Vialone nano:Microwaving      | **** | <0,0001 |
| Basmati:Raw vs. Fragrance:Raw                 | ns   | 0,9831  |
| Basmati:Raw vs. Fragrance:Boiling             | **** | <0,0001 |
| Basmati:Raw vs. Fragrance:Stewing             | **** | <0,0001 |
| Basmati:Raw vs. Fragrance:Microwaving         | **** | <0,0001 |
| Basmati:Raw vs. Arborio:Raw                   | ns   | >0,9999 |
| Basmati:Raw vs. Arborio:Boiling               | **** | <0,0001 |
| Basmati:Raw vs. Arborio:Stewing               | **** | <0,0001 |
| Basmati:Raw vs. Arborio:Microwaving           | **** | <0,0001 |
| Basmati:Boiling vs. Basmati:Stewing           | *    | 0,0343  |
| Basmati:Boiling vs. Basmati:Microwaving       | **** | <0,0001 |
| Basmati:Boiling vs. Carnaroli:Raw             | **** | <0,0001 |
| Basmati:Boiling vs. Carnaroli:Boiling         | **** | <0,0001 |
| Basmati:Boiling vs. Carnaroli:Stewing         | **** | <0,0001 |
| Basmati:Boiling vs. Carnaroli:Microwaving     | **** | <0,0001 |
| Basmati:Boiling vs. Vialone nano:Raw          | **** | <0,0001 |
| Basmati:Boiling vs. Vialone nano:Boiling      | **** | <0,0001 |
| Basmati:Boiling vs. Vialone nano:Stewing      | **** | <0,0001 |
| Basmati:Boiling vs. Vialone nano:Microwaving  | **** | <0,0001 |
| Basmati:Boiling vs. Fragrance:Raw             | **** | <0,0001 |
| Basmati:Boiling vs. Fragrance:Boiling         | **** | <0,0001 |
| Basmati:Boiling vs. Fragrance:Stewing         | **** | <0,0001 |
| Basmati:Boiling vs. Fragrance:Microwaving     | **** | <0,0001 |
| Basmati:Boiling vs. Arborio:Raw               | **** | <0,0001 |
| Basmati:Boiling vs. Arborio:Boiling           | **** | <0,0001 |
| Basmati:Boiling vs. Arborio:Stewing           | **** | <0,0001 |
| Basmati:Boiling vs. Arborio:Microwaving       | **** | <0,0001 |
| Basmati:Stewing vs. Basmati:Microwaving       | **** | <0,0001 |

|                                                  |      |         |
|--------------------------------------------------|------|---------|
| Basmati:Stewing vs. Carnaroli:Raw                | **** | <0,0001 |
| Basmati:Stewing vs. Carnaroli:Boiling            | **** | <0,0001 |
| Basmati:Stewing vs. Carnaroli:Stewing            | **** | <0,0001 |
| Basmati:Stewing vs. Carnaroli:Microwaving        | **** | <0,0001 |
| Basmati:Stewing vs. Vialone nano:Raw             | **** | <0,0001 |
| Basmati:Stewing vs. Vialone nano:Boiling         | **** | <0,0001 |
| Basmati:Stewing vs. Vialone nano:Stewing         | **** | <0,0001 |
| Basmati:Stewing vs. Vialone nano:Microwaving     | **** | <0,0001 |
| Basmati:Stewing vs. Fragrance:Raw                | **** | <0,0001 |
| Basmati:Stewing vs. Fragrance:Boiling            | **** | <0,0001 |
| Basmati:Stewing vs. Fragrance:Stewing            | **** | <0,0001 |
| Basmati:Stewing vs. Fragrance:Microwaving        | **** | <0,0001 |
| Basmati:Stewing vs. Arborio:Raw                  | **** | <0,0001 |
| Basmati:Stewing vs. Arborio:Boiling              | **** | <0,0001 |
| Basmati:Stewing vs. Arborio:Stewing              | ns   | 0,9652  |
| Basmati:Stewing vs. Arborio:Microwaving          | **** | <0,0001 |
| Basmati:Microwaving vs. Carnaroli:Raw            | **** | <0,0001 |
| Basmati:Microwaving vs. Carnaroli:Boiling        | **** | <0,0001 |
| Basmati:Microwaving vs. Carnaroli:Stewing        | **   | 0,0029  |
| Basmati:Microwaving vs. Carnaroli:Microwaving    | ns   | >0,9999 |
| Basmati:Microwaving vs. Vialone nano:Raw         | **** | <0,0001 |
| Basmati:Microwaving vs. Vialone nano:Boiling     | **** | <0,0001 |
| Basmati:Microwaving vs. Vialone nano:Stewing     | **** | <0,0001 |
| Basmati:Microwaving vs. Vialone nano:Microwaving | **** | <0,0001 |
| Basmati:Microwaving vs. Fragrance:Raw            | **** | <0,0001 |
| Basmati:Microwaving vs. Fragrance:Boiling        | **** | <0,0001 |
| Basmati:Microwaving vs. Fragrance:Stewing        | **** | <0,0001 |
| Basmati:Microwaving vs. Fragrance:Microwaving    | ns   | 0,3875  |
| Basmati:Microwaving vs. Arborio:Raw              | **** | <0,0001 |
| Basmati:Microwaving vs. Arborio:Boiling          | **** | <0,0001 |
| Basmati:Microwaving vs. Arborio:Stewing          | **** | <0,0001 |
| Basmati:Microwaving vs. Arborio:Microwaving      | ns   | >0,9999 |
| Carnaroli:Raw vs. Carnaroli:Boiling              | **** | <0,0001 |
| Carnaroli:Raw vs. Carnaroli:Stewing              | **** | <0,0001 |
| Carnaroli:Raw vs. Carnaroli:Microwaving          | **** | <0,0001 |
| Carnaroli:Raw vs. Vialone nano:Raw               | ns   | 0,5325  |
| Carnaroli:Raw vs. Vialone nano:Boiling           | **** | <0,0001 |
| Carnaroli:Raw vs. Vialone nano:Stewing           | **** | <0,0001 |
| Carnaroli:Raw vs. Vialone nano:Microwaving       | **** | <0,0001 |
| Carnaroli:Raw vs. Fragrance:Raw                  | ns   | >0,9999 |
| Carnaroli:Raw vs. Fragrance:Boiling              | **** | <0,0001 |
| Carnaroli:Raw vs. Fragrance:Stewing              | **** | <0,0001 |
| Carnaroli:Raw vs. Fragrance:Microwaving          | **** | <0,0001 |
| Carnaroli:Raw vs. Arborio:Raw                    | ns   | 0,7744  |
| Carnaroli:Raw vs. Arborio:Boiling                | **** | <0,0001 |
| Carnaroli:Raw vs. Arborio:Stewing                | **** | <0,0001 |
| Carnaroli:Raw vs. Arborio:Microwaving            | **** | <0,0001 |
| Carnaroli:Boiling vs. Carnaroli:Stewing          | **** | <0,0001 |
| Carnaroli:Boiling vs. Carnaroli:Microwaving      | **** | <0,0001 |
| Carnaroli:Boiling vs. Vialone nano:Raw           | **** | <0,0001 |
| Carnaroli:Boiling vs. Vialone nano:Boiling       | ns   | 0,1697  |
| Carnaroli:Boiling vs. Vialone nano:Stewing       | **** | <0,0001 |
| Carnaroli:Boiling vs. Vialone nano:Microwaving   | **** | <0,0001 |
| Carnaroli:Boiling vs. Fragrance:Raw              | **** | <0,0001 |
| Carnaroli:Boiling vs. Fragrance:Boiling          | ns   | 0,7374  |
| Carnaroli:Boiling vs. Fragrance:Stewing          | **** | <0,0001 |
| Carnaroli:Boiling vs. Fragrance:Microwaving      | **** | <0,0001 |
| Carnaroli:Boiling vs. Arborio:Raw                | **** | <0,0001 |
| Carnaroli:Boiling vs. Arborio:Boiling            | ***  | 0,0002  |
| Carnaroli:Boiling vs. Arborio:Stewing            | **** | <0,0001 |
| Carnaroli:Boiling vs. Arborio:Microwaving        | **** | <0,0001 |
| Carnaroli:Stewing vs. Carnaroli:Microwaving      | ***  | 0,0006  |
| Carnaroli:Stewing vs. Vialone nano:Raw           | **** | <0,0001 |
| Carnaroli:Stewing vs. Vialone nano:Boiling       | **** | <0,0001 |

|                                                    |      |         |
|----------------------------------------------------|------|---------|
| Carnaroli:Stewing vs. Vialone nano:Stewing         | **** | <0,0001 |
| Carnaroli:Stewing vs. Vialone nano:Microwaving     | ***  | 0,0008  |
| Carnaroli:Stewing vs. Fragrance:Raw                | **** | <0,0001 |
| Carnaroli:Stewing vs. Fragrance:Boiling            | **** | <0,0001 |
| Carnaroli:Stewing vs. Fragrance:Stewing            | **** | <0,0001 |
| Carnaroli:Stewing vs. Fragrance:Microwaving        | ns   | 0,9526  |
| Carnaroli:Stewing vs. Arborio:Raw                  | **** | <0,0001 |
| Carnaroli:Stewing vs. Arborio:Boiling              | **** | <0,0001 |
| Carnaroli:Stewing vs. Arborio:Stewing              | **** | <0,0001 |
| Carnaroli:Stewing vs. Arborio:Microwaving          | **   | 0,0055  |
| Carnaroli:Microwaving vs. Vialone nano:Raw         | **** | <0,0001 |
| Carnaroli:Microwaving vs. Vialone nano:Boiling     | **** | <0,0001 |
| Carnaroli:Microwaving vs. Vialone nano:Stewing     | **** | <0,0001 |
| Carnaroli:Microwaving vs. Vialone nano:Microwaving | **** | <0,0001 |
| Carnaroli:Microwaving vs. Fragrance:Raw            | **** | <0,0001 |
| Carnaroli:Microwaving vs. Fragrance:Boiling        | **** | <0,0001 |
| Carnaroli:Microwaving vs. Fragrance:Stewing        | **** | <0,0001 |
| Carnaroli:Microwaving vs. Fragrance:Microwaving    | ns   | 0,1497  |
| Carnaroli:Microwaving vs. Arborio:Raw              | **** | <0,0001 |
| Carnaroli:Microwaving vs. Arborio:Boiling          | **** | <0,0001 |
| Carnaroli:Microwaving vs. Arborio:Stewing          | **** | <0,0001 |
| Carnaroli:Microwaving vs. Arborio:Microwaving      | ns   | >0,9999 |
| Vialone nano:Raw vs. Vialone nano:Boiling          | **** | <0,0001 |
| Vialone nano:Raw vs. Vialone nano:Stewing          | **** | <0,0001 |
| Vialone nano:Raw vs. Vialone nano:Microwaving      | **** | <0,0001 |
| Vialone nano:Raw vs. Fragrance:Raw                 | ns   | 0,9700  |
| Vialone nano:Raw vs. Fragrance:Boiling             | **** | <0,0001 |
| Vialone nano:Raw vs. Fragrance:Stewing             | **** | <0,0001 |
| Vialone nano:Raw vs. Fragrance:Microwaving         | **** | <0,0001 |
| Vialone nano:Raw vs. Arborio:Raw                   | ns   | >0,9999 |
| Vialone nano:Raw vs. Arborio:Boiling               | **** | <0,0001 |
| Vialone nano:Raw vs. Arborio:Stewing               | **** | <0,0001 |
| Vialone nano:Raw vs. Arborio:Microwaving           | **** | <0,0001 |
| Vialone nano:Boiling vs. Vialone nano:Stewing      | **** | <0,0001 |
| Vialone nano:Boiling vs. Vialone nano:Microwaving  | **** | <0,0001 |
| Vialone nano:Boiling vs. Fragrance:Raw             | **** | <0,0001 |
| Vialone nano:Boiling vs. Fragrance:Boiling         | ns   | >0,9999 |
| Vialone nano:Boiling vs. Fragrance:Stewing         | **** | <0,0001 |
| Vialone nano:Boiling vs. Fragrance:Microwaving     | **** | <0,0001 |
| Vialone nano:Boiling vs. Arborio:Raw               | **** | <0,0001 |
| Vialone nano:Boiling vs. Arborio:Boiling           | **** | <0,0001 |
| Vialone nano:Boiling vs. Arborio:Stewing           | **** | <0,0001 |
| Vialone nano:Boiling vs. Arborio:Microwaving       | **** | <0,0001 |
| Vialone nano:Stewing vs. Vialone nano:Microwaving  | **** | <0,0001 |
| Vialone nano:Stewing vs. Fragrance:Raw             | **** | <0,0001 |
| Vialone nano:Stewing vs. Fragrance:Boiling         | **** | <0,0001 |
| Vialone nano:Stewing vs. Fragrance:Stewing         | **** | <0,0001 |
| Vialone nano:Stewing vs. Fragrance:Microwaving     | **** | <0,0001 |
| Vialone nano:Stewing vs. Arborio:Raw               | **** | <0,0001 |
| Vialone nano:Stewing vs. Arborio:Boiling           | ns   | 0,9568  |
| Vialone nano:Stewing vs. Arborio:Stewing           | **** | <0,0001 |
| Vialone nano:Stewing vs. Arborio:Microwaving       | **** | <0,0001 |
| Vialone nano:Microwaving vs. Fragrance:Raw         | **** | <0,0001 |
| Vialone nano:Microwaving vs. Fragrance:Boiling     | **** | <0,0001 |
| Vialone nano:Microwaving vs. Fragrance:Stewing     | **** | <0,0001 |
| Vialone nano:Microwaving vs. Fragrance:Microwaving | **** | <0,0001 |
| Vialone nano:Microwaving vs. Arborio:Raw           | **** | <0,0001 |
| Vialone nano:Microwaving vs. Arborio:Boiling       | **** | <0,0001 |
| Vialone nano:Microwaving vs. Arborio:Stewing       | **** | <0,0001 |
| Vialone nano:Microwaving vs. Arborio:Microwaving   | **** | <0,0001 |
| Fragrance:Raw vs. Fragrance:Boiling                | **** | <0,0001 |
| Fragrance:Raw vs. Fragrance:Stewing                | **** | <0,0001 |
| Fragrance:Raw vs. Fragrance:Microwaving            | **** | <0,0001 |
| Fragrance:Raw vs. Arborio:Raw                      | ns   | 0,9977  |

---

|                                               |      |         |
|-----------------------------------------------|------|---------|
| Fragrance:Raw vs. Arborio:Boiling             | **** | <0,0001 |
| Fragrance:Raw vs. Arborio:Stewing             | **** | <0,0001 |
| Fragrance:Raw vs. Arborio:Microwaving         | **** | <0,0001 |
| Fragrance:Boiling vs. Fragrance:Stewing       | **** | <0,0001 |
| Fragrance:Boiling vs. Fragrance:Microwaving   | **** | <0,0001 |
| Fragrance:Boiling vs. Arborio:Raw             | **** | <0,0001 |
| Fragrance:Boiling vs. Arborio:Boiling         | **** | <0,0001 |
| Fragrance:Boiling vs. Arborio:Stewing         | **** | <0,0001 |
| Fragrance:Boiling vs. Arborio:Microwaving     | **** | <0,0001 |
| Fragrance:Stewing vs. Fragrance:Microwaving   | **** | <0,0001 |
| Fragrance:Stewing vs. Arborio:Raw             | **** | <0,0001 |
| Fragrance:Stewing vs. Arborio:Boiling         | **** | <0,0001 |
| Fragrance:Stewing vs. Arborio:Stewing         | **** | <0,0001 |
| Fragrance:Stewing vs. Arborio:Microwaving     | **** | <0,0001 |
| Fragrance:Microwaving vs. Arborio:Raw         | **** | <0,0001 |
| Fragrance:Microwaving vs. Arborio:Boiling     | **** | <0,0001 |
| Fragrance:Microwaving vs. Arborio:Stewing     | **** | <0,0001 |
| Fragrance:Microwaving vs. Arborio:Microwaving | ns   | 0,5261  |
| Arborio:Raw vs. Arborio:Boiling               | **** | <0,0001 |
| Arborio:Raw vs. Arborio:Stewing               | **** | <0,0001 |
| Arborio:Raw vs. Arborio:Microwaving           | **** | <0,0001 |
| Arborio:Boiling vs. Arborio:Stewing           | **** | <0,0001 |
| Arborio:Boiling vs. Arborio:Microwaving       | **** | <0,0001 |
| Arborio:Stewing vs. Arborio:Microwaving       | **** | <0,0001 |

---
