# Supplementary material for: Nutritional Properties of Rice Varieties Commonly Consumed in Italy and Applicability in Gluten Free Diet
Source: MDPI journal article supplement (doi:10.3390/foods10061375), 2021-06-14
Supplement: s1 [file s1]

**Table S1** Tukey's multiple comparisons test of detectable proteins content

| <b>Tukey's multiple comparisons test</b>  | <b>Summary</b> | <b>Adjusted P Value</b> |
|-------------------------------------------|----------------|-------------------------|
| Ribe:Raw vs. Ribe:Boiling                 | ****           | <0,0001                 |
| Ribe:Raw vs. Ribe:Stewing                 | ****           | <0,0001                 |
| Ribe:Raw vs. Ribe:Microwaving             | ****           | <0,0001                 |
| Ribe:Raw vs. Basmati:Raw                  | ****           | <0,0001                 |
| Ribe:Raw vs. Basmati:Boiling              | ****           | <0,0001                 |
| Ribe:Raw vs. Basmati:Stewing              | ****           | <0,0001                 |
| Ribe:Raw vs. Basmati:Microwaving          | ****           | <0,0001                 |
| Ribe:Raw vs. Carnaroli:Raw                | ****           | <0,0001                 |
| Ribe:Raw vs. Carnaroli:Boiling            | ****           | <0,0001                 |
| Ribe:Raw vs. Carnaroli:Stewing            | ****           | <0,0001                 |
| Ribe:Raw vs. Carnaroli:Microwaving        | ****           | <0,0001                 |
| Ribe:Raw vs. Vialone nano:Raw             | ****           | <0,0001                 |
| Ribe:Raw vs. Vialone nano:Boiling         | ****           | <0,0001                 |
| Ribe:Raw vs. Vialone nano:Stewing         | ****           | <0,0001                 |
| Ribe:Raw vs. Vialone nano:Microwaving     | ****           | <0,0001                 |
| Ribe:Raw vs. Fragrance:Raw                | ****           | <0,0001                 |
| Ribe:Raw vs. Fragrance:Boiling            | ****           | <0,0001                 |
| Ribe:Raw vs. Fragrance:Stewing            | ****           | <0,0001                 |
| Ribe:Raw vs. Fragrance:Microwaving        | ****           | <0,0001                 |
| Ribe:Raw vs. Arborio:Raw                  | ****           | <0,0001                 |
| Ribe:Raw vs. Arborio:Boiling              | ****           | <0,0001                 |
| Ribe:Raw vs. Arborio:Stewing              | ****           | <0,0001                 |
| Ribe:Raw vs. Arborio:Microwaving          | ****           | <0,0001                 |
| Ribe:Boiling vs. Ribe:Stewing             | ****           | <0,0001                 |
| Ribe:Boiling vs. Ribe:Microwaving         | ****           | <0,0001                 |
| Ribe:Boiling vs. Basmati:Raw              | ****           | <0,0001                 |
| Ribe:Boiling vs. Basmati:Boiling          | ****           | <0,0001                 |
| Ribe:Boiling vs. Basmati:Stewing          | ****           | <0,0001                 |
| Ribe:Boiling vs. Basmati:Microwaving      | ****           | <0,0001                 |
| Ribe:Boiling vs. Carnaroli:Raw            | ****           | <0,0001                 |
| Ribe:Boiling vs. Carnaroli:Boiling        | ****           | <0,0001                 |
| Ribe:Boiling vs. Carnaroli:Stewing        | ****           | <0,0001                 |
| Ribe:Boiling vs. Carnaroli:Microwaving    | ****           | <0,0001                 |
| Ribe:Boiling vs. Vialone nano:Raw         | ****           | <0,0001                 |
| Ribe:Boiling vs. Vialone nano:Boiling     | ****           | <0,0001                 |
| Ribe:Boiling vs. Vialone nano:Stewing     | **             | 0,0029                  |
| Ribe:Boiling vs. Vialone nano:Microwaving | ***            | 0,0003                  |
| Ribe:Boiling vs. Fragrance:Raw            | ****           | <0,0001                 |
| Ribe:Boiling vs. Fragrance:Boiling        | ****           | <0,0001                 |
| Ribe:Boiling vs. Fragrance:Stewing        | ****           | <0,0001                 |
| Ribe:Boiling vs. Fragrance:Microwaving    | ****           | <0,0001                 |
| Ribe:Boiling vs. Arborio:Raw              | ****           | <0,0001                 |
| Ribe:Boiling vs. Arborio:Boiling          | ****           | <0,0001                 |
| Ribe:Boiling vs. Arborio:Stewing          | ****           | <0,0001                 |
| Ribe:Boiling vs. Arborio:Microwaving      | ****           | <0,0001                 |
| Ribe:Stewing vs. Ribe:Microwaving         | ****           | <0,0001                 |
| Ribe:Stewing vs. Basmati:Raw              | ****           | <0,0001                 |
| Ribe:Stewing vs. Basmati:Boiling          | ****           | <0,0001                 |
| Ribe:Stewing vs. Basmati:Stewing          | ****           | <0,0001                 |
| Ribe:Stewing vs. Basmati:Microwaving      | ****           | <0,0001                 |
| Ribe:Stewing vs. Carnaroli:Raw            | ****           | <0,0001                 |
| Ribe:Stewing vs. Carnaroli:Boiling        | ****           | <0,0001                 |
| Ribe:Stewing vs. Carnaroli:Stewing        | ****           | <0,0001                 |
| Ribe:Stewing vs. Carnaroli:Microwaving    | ****           | <0,0001                 |
| Ribe:Stewing vs. Vialone nano:Raw         | ****           | <0,0001                 |
| Ribe:Stewing vs. Vialone nano:Boiling     | ****           | <0,0001                 |
| Ribe:Stewing vs. Vialone nano:Stewing     | ****           | <0,0001                 |
| Ribe:Stewing vs. Vialone nano:Microwaving | ****           | <0,0001                 |
| Ribe:Stewing vs. Fragrance:Raw            | ****           | <0,0001                 |
| Ribe:Stewing vs. Fragrance:Boiling        | ****           | <0,0001                 |

|                                               |      |         |
|-----------------------------------------------|------|---------|
| Ribe:Stewing vs. Fragrance:Stewing            | **** | <0,0001 |
| Ribe:Stewing vs. Fragrance:Microwaving        | **** | <0,0001 |
| Ribe:Stewing vs. Arborio:Raw                  | **** | <0,0001 |
| Ribe:Stewing vs. Arborio:Boiling              | **** | <0,0001 |
| Ribe:Stewing vs. Arborio:Stewing              | **** | <0,0001 |
| Ribe:Stewing vs. Arborio:Microwaving          | **** | <0,0001 |
| Ribe:Microwaving vs. Basmati:Raw              | **** | <0,0001 |
| Ribe:Microwaving vs. Basmati:Boiling          | **** | <0,0001 |
| Ribe:Microwaving vs. Basmati:Stewing          | **** | <0,0001 |
| Ribe:Microwaving vs. Basmati:Microwaving      | ns   | 0,9999  |
| Ribe:Microwaving vs. Carnaroli:Raw            | *    | 0,0250  |
| Ribe:Microwaving vs. Carnaroli:Boiling        | **** | <0,0001 |
| Ribe:Microwaving vs. Carnaroli:Stewing        | **** | <0,0001 |
| Ribe:Microwaving vs. Carnaroli:Microwaving    | **** | <0,0001 |
| Ribe:Microwaving vs. Vialone nano:Raw         | **** | <0,0001 |
| Ribe:Microwaving vs. Vialone nano:Boiling     | **** | <0,0001 |
| Ribe:Microwaving vs. Vialone nano:Stewing     | **** | <0,0001 |
| Ribe:Microwaving vs. Vialone nano:Microwaving | **** | <0,0001 |
| Ribe:Microwaving vs. Fragrance:Raw            | **** | <0,0001 |
| Ribe:Microwaving vs. Fragrance:Boiling        | **** | <0,0001 |
| Ribe:Microwaving vs. Fragrance:Stewing        | **** | <0,0001 |
| Ribe:Microwaving vs. Fragrance:Microwaving    | **** | <0,0001 |
| Ribe:Microwaving vs. Arborio:Raw              | **** | <0,0001 |
| Ribe:Microwaving vs. Arborio:Boiling          | **** | <0,0001 |
| Ribe:Microwaving vs. Arborio:Stewing          | **** | <0,0001 |
| Ribe:Microwaving vs. Arborio:Microwaving      | **** | <0,0001 |
| Basmati:Raw vs. Basmati:Boiling               | **** | <0,0001 |
| Basmati:Raw vs. Basmati:Stewing               | **** | <0,0001 |
| Basmati:Raw vs. Basmati:Microwaving           | **** | <0,0001 |
| Basmati:Raw vs. Carnaroli:Raw                 | **** | <0,0001 |
| Basmati:Raw vs. Carnaroli:Boiling             | **** | <0,0001 |
| Basmati:Raw vs. Carnaroli:Stewing             | **** | <0,0001 |
| Basmati:Raw vs. Carnaroli:Microwaving         | **** | <0,0001 |
| Basmati:Raw vs. Vialone nano:Raw              | **** | <0,0001 |
| Basmati:Raw vs. Vialone nano:Boiling          | **** | <0,0001 |
| Basmati:Raw vs. Vialone nano:Stewing          | **** | <0,0001 |
| Basmati:Raw vs. Vialone nano:Microwaving      | **** | <0,0001 |
| Basmati:Raw vs. Fragrance:Raw                 | **** | <0,0001 |
| Basmati:Raw vs. Fragrance:Boiling             | **** | <0,0001 |
| Basmati:Raw vs. Fragrance:Stewing             | **** | <0,0001 |
| Basmati:Raw vs. Fragrance:Microwaving         | **** | <0,0001 |
| Basmati:Raw vs. Arborio:Raw                   | **** | <0,0001 |
| Basmati:Raw vs. Arborio:Boiling               | **** | <0,0001 |
| Basmati:Raw vs. Arborio:Stewing               | **** | <0,0001 |
| Basmati:Raw vs. Arborio:Microwaving           | **** | <0,0001 |
| Basmati:Boiling vs. Basmati:Stewing           | **** | <0,0001 |
| Basmati:Boiling vs. Basmati:Microwaving       | **** | <0,0001 |
| Basmati:Boiling vs. Carnaroli:Raw             | **** | <0,0001 |
| Basmati:Boiling vs. Carnaroli:Boiling         | **** | <0,0001 |
| Basmati:Boiling vs. Carnaroli:Stewing         | **** | <0,0001 |
| Basmati:Boiling vs. Carnaroli:Microwaving     | **** | <0,0001 |
| Basmati:Boiling vs. Vialone nano:Raw          | **** | <0,0001 |
| Basmati:Boiling vs. Vialone nano:Boiling      | **** | <0,0001 |
| Basmati:Boiling vs. Vialone nano:Stewing      | **** | <0,0001 |
| Basmati:Boiling vs. Vialone nano:Microwaving  | **** | <0,0001 |
| Basmati:Boiling vs. Fragrance:Raw             | **** | <0,0001 |
| Basmati:Boiling vs. Fragrance:Boiling         | **** | <0,0001 |
| Basmati:Boiling vs. Fragrance:Stewing         | **** | <0,0001 |
| Basmati:Boiling vs. Fragrance:Microwaving     | **** | <0,0001 |
| Basmati:Boiling vs. Arborio:Raw               | **** | <0,0001 |
| Basmati:Boiling vs. Arborio:Boiling           | **** | <0,0001 |
| Basmati:Boiling vs. Arborio:Stewing           | **** | <0,0001 |
| Basmati:Boiling vs. Arborio:Microwaving       | **** | <0,0001 |
| Basmati:Stewing vs. Basmati:Microwaving       | **** | <0,0001 |

|                                                  |      |         |
|--------------------------------------------------|------|---------|
| Basmati:Stewing vs. Carnaroli:Raw                | **** | <0,0001 |
| Basmati:Stewing vs. Carnaroli:Boiling            | **** | <0,0001 |
| Basmati:Stewing vs. Carnaroli:Stewing            | **** | <0,0001 |
| Basmati:Stewing vs. Carnaroli:Microwaving        | **** | <0,0001 |
| Basmati:Stewing vs. Vialone nano:Raw             | **** | <0,0001 |
| Basmati:Stewing vs. Vialone nano:Boiling         | **** | <0,0001 |
| Basmati:Stewing vs. Vialone nano:Stewing         | **** | <0,0001 |
| Basmati:Stewing vs. Vialone nano:Microwaving     | **** | <0,0001 |
| Basmati:Stewing vs. Fragrance:Raw                | **** | <0,0001 |
| Basmati:Stewing vs. Fragrance:Boiling            | **** | <0,0001 |
| Basmati:Stewing vs. Fragrance:Stewing            | **** | <0,0001 |
| Basmati:Stewing vs. Fragrance:Microwaving        | **** | <0,0001 |
| Basmati:Stewing vs. Arborio:Raw                  | **** | <0,0001 |
| Basmati:Stewing vs. Arborio:Boiling              | **** | <0,0001 |
| Basmati:Stewing vs. Arborio:Stewing              | **** | <0,0001 |
| Basmati:Stewing vs. Arborio:Microwaving          | **** | <0,0001 |
| Basmati:Microwaving vs. Carnaroli:Raw            | ns   | 0,3932  |
| Basmati:Microwaving vs. Carnaroli:Boiling        | **** | <0,0001 |
| Basmati:Microwaving vs. Carnaroli:Stewing        | **** | <0,0001 |
| Basmati:Microwaving vs. Carnaroli:Microwaving    | **** | <0,0001 |
| Basmati:Microwaving vs. Vialone nano:Raw         | **** | <0,0001 |
| Basmati:Microwaving vs. Vialone nano:Boiling     | **** | <0,0001 |
| Basmati:Microwaving vs. Vialone nano:Stewing     | **** | <0,0001 |
| Basmati:Microwaving vs. Vialone nano:Microwaving | **** | <0,0001 |
| Basmati:Microwaving vs. Fragrance:Raw            | **** | <0,0001 |
| Basmati:Microwaving vs. Fragrance:Boiling        | **** | <0,0001 |
| Basmati:Microwaving vs. Fragrance:Stewing        | **** | <0,0001 |
| Basmati:Microwaving vs. Fragrance:Microwaving    | **** | <0,0001 |
| Basmati:Microwaving vs. Arborio:Raw              | **** | <0,0001 |
| Basmati:Microwaving vs. Arborio:Boiling          | **** | <0,0001 |
| Basmati:Microwaving vs. Arborio:Stewing          | **** | <0,0001 |
| Basmati:Microwaving vs. Arborio:Microwaving      | **** | <0,0001 |
| Carnaroli:Raw vs. Carnaroli:Boiling              | **** | <0,0001 |
| Carnaroli:Raw vs. Carnaroli:Stewing              | **** | <0,0001 |
| Carnaroli:Raw vs. Carnaroli:Microwaving          | **** | <0,0001 |
| Carnaroli:Raw vs. Vialone nano:Raw               | **** | <0,0001 |
| Carnaroli:Raw vs. Vialone nano:Boiling           | **** | <0,0001 |
| Carnaroli:Raw vs. Vialone nano:Stewing           | **** | <0,0001 |
| Carnaroli:Raw vs. Vialone nano:Microwaving       | **** | <0,0001 |
| Carnaroli:Raw vs. Fragrance:Raw                  | **** | <0,0001 |
| Carnaroli:Raw vs. Fragrance:Boiling              | **** | <0,0001 |
| Carnaroli:Raw vs. Fragrance:Stewing              | **** | <0,0001 |
| Carnaroli:Raw vs. Fragrance:Microwaving          | **** | <0,0001 |
| Carnaroli:Raw vs. Arborio:Raw                    | **** | <0,0001 |
| Carnaroli:Raw vs. Arborio:Boiling                | **** | <0,0001 |
| Carnaroli:Raw vs. Arborio:Stewing                | **** | <0,0001 |
| Carnaroli:Raw vs. Arborio:Microwaving            | **** | <0,0001 |
| Carnaroli:Boiling vs. Carnaroli:Stewing          | **** | <0,0001 |
| Carnaroli:Boiling vs. Carnaroli:Microwaving      | **** | <0,0001 |
| Carnaroli:Boiling vs. Vialone nano:Raw           | *    | 0,0134  |
| Carnaroli:Boiling vs. Vialone nano:Boiling       | **** | <0,0001 |
| Carnaroli:Boiling vs. Vialone nano:Stewing       | **** | <0,0001 |
| Carnaroli:Boiling vs. Vialone nano:Microwaving   | **** | <0,0001 |
| Carnaroli:Boiling vs. Fragrance:Raw              | **** | <0,0001 |
| Carnaroli:Boiling vs. Fragrance:Boiling          | **** | <0,0001 |
| Carnaroli:Boiling vs. Fragrance:Stewing          | **** | <0,0001 |
| Carnaroli:Boiling vs. Fragrance:Microwaving      | **** | <0,0001 |
| Carnaroli:Boiling vs. Arborio:Raw                | **** | <0,0001 |
| Carnaroli:Boiling vs. Arborio:Boiling            | ns   | 0,1589  |
| Carnaroli:Boiling vs. Arborio:Stewing            | **** | <0,0001 |
| Carnaroli:Boiling vs. Arborio:Microwaving        | **** | <0,0001 |
| Carnaroli:Stewing vs. Carnaroli:Microwaving      | **** | <0,0001 |
| Carnaroli:Stewing vs. Vialone nano:Raw           | **** | <0,0001 |
| Carnaroli:Stewing vs. Vialone nano:Boiling       | **** | <0,0001 |

|                                                    |      |         |
|----------------------------------------------------|------|---------|
| Carnaroli:Stewing vs. Vialone nano:Stewing         | **** | <0,0001 |
| Carnaroli:Stewing vs. Vialone nano:Microwaving     | **** | <0,0001 |
| Carnaroli:Stewing vs. Fragrance:Raw                | **** | <0,0001 |
| Carnaroli:Stewing vs. Fragrance:Boiling            | **** | <0,0001 |
| Carnaroli:Stewing vs. Fragrance:Stewing            | ns   | 0,9982  |
| Carnaroli:Stewing vs. Fragrance:Microwaving        | **** | <0,0001 |
| Carnaroli:Stewing vs. Arborio:Raw                  | **** | <0,0001 |
| Carnaroli:Stewing vs. Arborio:Boiling              | **** | <0,0001 |
| Carnaroli:Stewing vs. Arborio:Stewing              | **** | <0,0001 |
| Carnaroli:Stewing vs. Arborio:Microwaving          | **** | <0,0001 |
| Carnaroli:Microwaving vs. Vialone nano:Raw         | **** | <0,0001 |
| Carnaroli:Microwaving vs. Vialone nano:Boiling     | **** | <0,0001 |
| Carnaroli:Microwaving vs. Vialone nano:Stewing     | **** | <0,0001 |
| Carnaroli:Microwaving vs. Vialone nano:Microwaving | **** | <0,0001 |
| Carnaroli:Microwaving vs. Fragrance:Raw            | **** | <0,0001 |
| Carnaroli:Microwaving vs. Fragrance:Boiling        | **** | <0,0001 |
| Carnaroli:Microwaving vs. Fragrance:Stewing        | **** | <0,0001 |
| Carnaroli:Microwaving vs. Fragrance:Microwaving    | ns   | 0,8647  |
| Carnaroli:Microwaving vs. Arborio:Raw              | **** | <0,0001 |
| Carnaroli:Microwaving vs. Arborio:Boiling          | **** | <0,0001 |
| Carnaroli:Microwaving vs. Arborio:Stewing          | **** | <0,0001 |
| Carnaroli:Microwaving vs. Arborio:Microwaving      | **** | <0,0001 |
| Vialone nano:Raw vs. Vialone nano:Boiling          | **** | <0,0001 |
| Vialone nano:Raw vs. Vialone nano:Stewing          | **** | <0,0001 |
| Vialone nano:Raw vs. Vialone nano:Microwaving      | **** | <0,0001 |
| Vialone nano:Raw vs. Fragrance:Raw                 | **** | <0,0001 |
| Vialone nano:Raw vs. Fragrance:Boiling             | **** | <0,0001 |
| Vialone nano:Raw vs. Fragrance:Stewing             | **** | <0,0001 |
| Vialone nano:Raw vs. Fragrance:Microwaving         | **** | <0,0001 |
| Vialone nano:Raw vs. Arborio:Raw                   | **** | <0,0001 |
| Vialone nano:Raw vs. Arborio:Boiling               | ns   | >0,9999 |
| Vialone nano:Raw vs. Arborio:Stewing               | **** | <0,0001 |
| Vialone nano:Raw vs. Arborio:Microwaving           | **** | <0,0001 |
| Vialone nano:Boiling vs. Vialone nano:Stewing      | **** | <0,0001 |
| Vialone nano:Boiling vs. Vialone nano:Microwaving  | **** | <0,0001 |
| Vialone nano:Boiling vs. Fragrance:Raw             | **** | <0,0001 |
| Vialone nano:Boiling vs. Fragrance:Boiling         | **** | <0,0001 |
| Vialone nano:Boiling vs. Fragrance:Stewing         | **** | <0,0001 |
| Vialone nano:Boiling vs. Fragrance:Microwaving     | **** | <0,0001 |
| Vialone nano:Boiling vs. Arborio:Raw               | **** | <0,0001 |
| Vialone nano:Boiling vs. Arborio:Boiling           | **** | <0,0001 |
| Vialone nano:Boiling vs. Arborio:Stewing           | **** | <0,0001 |
| Vialone nano:Boiling vs. Arborio:Microwaving       | **** | <0,0001 |
| Vialone nano:Stewing vs. Vialone nano:Microwaving  | ns   | >0,9999 |
| Vialone nano:Stewing vs. Fragrance:Raw             | **** | <0,0001 |
| Vialone nano:Stewing vs. Fragrance:Boiling         | **** | <0,0001 |
| Vialone nano:Stewing vs. Fragrance:Stewing         | **** | <0,0001 |
| Vialone nano:Stewing vs. Fragrance:Microwaving     | **** | <0,0001 |
| Vialone nano:Stewing vs. Arborio:Raw               | **** | <0,0001 |
| Vialone nano:Stewing vs. Arborio:Boiling           | **** | <0,0001 |
| Vialone nano:Stewing vs. Arborio:Stewing           | **** | <0,0001 |
| Vialone nano:Stewing vs. Arborio:Microwaving       | **** | <0,0001 |
| Vialone nano:Microwaving vs. Fragrance:Raw         | **** | <0,0001 |
| Vialone nano:Microwaving vs. Fragrance:Boiling     | **** | <0,0001 |
| Vialone nano:Microwaving vs. Fragrance:Stewing     | **** | <0,0001 |
| Vialone nano:Microwaving vs. Fragrance:Microwaving | **** | <0,0001 |
| Vialone nano:Microwaving vs. Arborio:Raw           | **** | <0,0001 |
| Vialone nano:Microwaving vs. Arborio:Boiling       | **** | <0,0001 |
| Vialone nano:Microwaving vs. Arborio:Stewing       | **** | <0,0001 |
| Vialone nano:Microwaving vs. Arborio:Microwaving   | **** | <0,0001 |
| Fragrance:Raw vs. Fragrance:Boiling                | **** | <0,0001 |
| Fragrance:Raw vs. Fragrance:Stewing                | **** | <0,0001 |
| Fragrance:Raw vs. Fragrance:Microwaving            | **** | <0,0001 |
| Fragrance:Raw vs. Arborio:Raw                      | **** | <0,0001 |

|                                               |      |         |
|-----------------------------------------------|------|---------|
| Fragrance:Raw vs. Arborio:Boiling             | **** | <0,0001 |
| Fragrance:Raw vs. Arborio:Stewing             | **** | <0,0001 |
| Fragrance:Raw vs. Arborio:Microwaving         | **** | <0,0001 |
| Fragrance:Boiling vs. Fragrance:Stewing       | **** | <0,0001 |
| Fragrance:Boiling vs. Fragrance:Microwaving   | **** | <0,0001 |
| Fragrance:Boiling vs. Arborio:Raw             | **** | <0,0001 |
| Fragrance:Boiling vs. Arborio:Boiling         | **** | <0,0001 |
| Fragrance:Boiling vs. Arborio:Stewing         | *    | 0,0494  |
| Fragrance:Boiling vs. Arborio:Microwaving     | ns   | >0,9999 |
| Fragrance:Stewing vs. Fragrance:Microwaving   | **** | <0,0001 |
| Fragrance:Stewing vs. Arborio:Raw             | **** | <0,0001 |
| Fragrance:Stewing vs. Arborio:Boiling         | **** | <0,0001 |
| Fragrance:Stewing vs. Arborio:Stewing         | **** | <0,0001 |
| Fragrance:Stewing vs. Arborio:Microwaving     | **** | <0,0001 |
| Fragrance:Microwaving vs. Arborio:Raw         | **** | <0,0001 |
| Fragrance:Microwaving vs. Arborio:Boiling     | **** | <0,0001 |
| Fragrance:Microwaving vs. Arborio:Stewing     | **** | <0,0001 |
| Fragrance:Microwaving vs. Arborio:Microwaving | **** | <0,0001 |
| Arborio:Raw vs. Arborio:Boiling               | **** | <0,0001 |
| Arborio:Raw vs. Arborio:Stewing               | **** | <0,0001 |
| Arborio:Raw vs. Arborio:Microwaving           | **** | <0,0001 |
| Arborio:Boiling vs. Arborio:Stewing           | **** | <0,0001 |
| Arborio:Boiling vs. Arborio:Microwaving       | **** | <0,0001 |
| Arborio:Stewing vs. Arborio:Microwaving       | ns   | 0,0909  |
